# Supplementary material for: Circulating Contact-Pathway-Activating Microparticles Together with Factors IXa and XIa Induce Spontaneous Clotting in Plasma of Hematology and Cardiologic Patients
Source: PLoS One. 2014 Jan 31;9(1):e87692. doi: 10.1371/journal.pone.0087692 (PMC3909194; doi:10.1371/journal.pone.0087692)
Supplement: Table S3 — Diagnoses, ages, and coagulation tests data of subjects whose plasma were used in Thrombodinamics test in platelet free plasma, microparticles poor plasma and microparticles poor plasma supplemented with artificial phospholipid vesicles. (XLSX) [file pone.0087692.s003.xlsx]

## Sheet: Лист1
Table S3				APTT,sec	Prothrombin index,%	TT,sec	Fg, g/l	XIIа завис.фибринолиз [мин]	d-dimer, mkg/l
№	diagnosis	age	gender	32-37	70-130	12-19	1,8-3,5	4-12	50-250
1	Thrombophilia. Lower extremity vein thrombosis. Relapse. Pulmonary embolism.	57	m	39	45	18	2.7	7	150
2	Thrombophilia. Lower extremity vein thrombosis. Relapse. Pulmonary embolism.	57	m	35	87	20	2.6	9	188
3	Thrombophilia. Ischemic heart disease: myocardial infarction.	53	m	31	109	17	4	22	636
4	Bleeding duodenal erosion. Internal bleeding in April 2010	78	m	27	137	17	2.1		281
5	Pulmonary embolism. Hairy cell leukemia.	58	m	42	73	22	7.9	225	2674
6	Autoimmune hemolytic anemia.	18	w	29	65	16	3.8	36	672
7	Hereditary hemolytic anemia.	29	w	53	94	18	2.7	28	823
8	Bacterial endocarditis.		m	-	-	-	-	-	-
9	Stomach adenocarcinoma, Respiratory insufficiency, grade 2, hydrothorax.	68	m	27	90	14	3.5	25	9999
10	MDS Sideroblastic anemia.	50	m	35	75	16	3.5	59	2845
11	Hemophilia А, arthrosis deformans of the right knee joint.	31	m	30	71	17	3.3	4	194
12	constrictive large central artery atherosclerosis		w	-	-	-	-	-	-
13	Autoimmune hemolytic anemia, condition after splenectomy	20	w	38	100	-	4.1	17	-
14	Autoimmune hemolytic anemia, condition after splenectomy	20	w	37	102	-	3.8	12	-
15	liver cirrhosis, immune cytopenia, condition after splenectomy			57	37	-	1.2	8	-
16	immune cytopenia	20	w	35	81	-	1.7		-
17	hairy cell leukemia	65	m	30	77	-	1.8	56	-
18	condition after arthroplastic surgery	33	w	-	-	-	-	-	-
19	condition after arthroplastic surgery		w	-	-	-	-	-	-
20	Acute lymphoblastic leukemia		m	43	88	38	1.2	-	96
21	Juvenile myelomonocytic leukemia	1.5	m	27 (25-36,5)	110	30 (16-25)	1.6	-	2221
22	bone marrow donor	37	m	32	113	15	3.3	21	226
